# Supplementary material
Source: PubMed Central journal article supplement (PMC4816116)
Supplement: cdd201569x1.pdf [file cdd201569x1.pdf]

**a**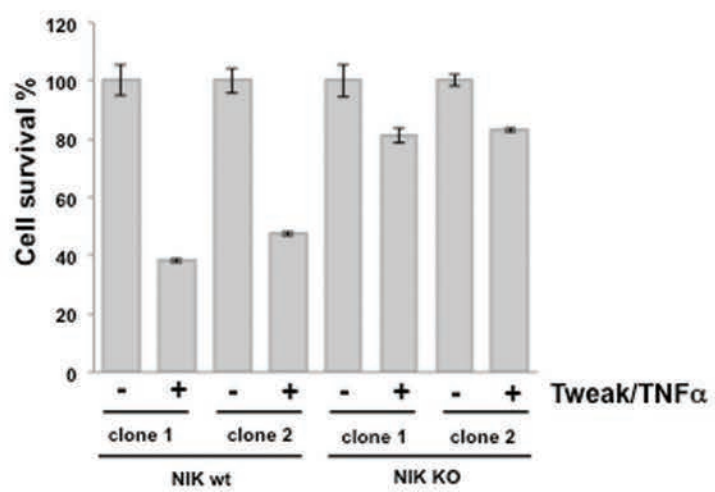**b**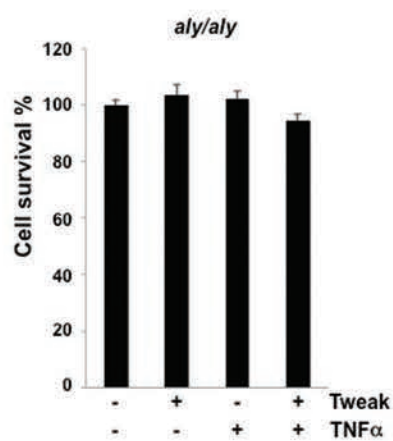

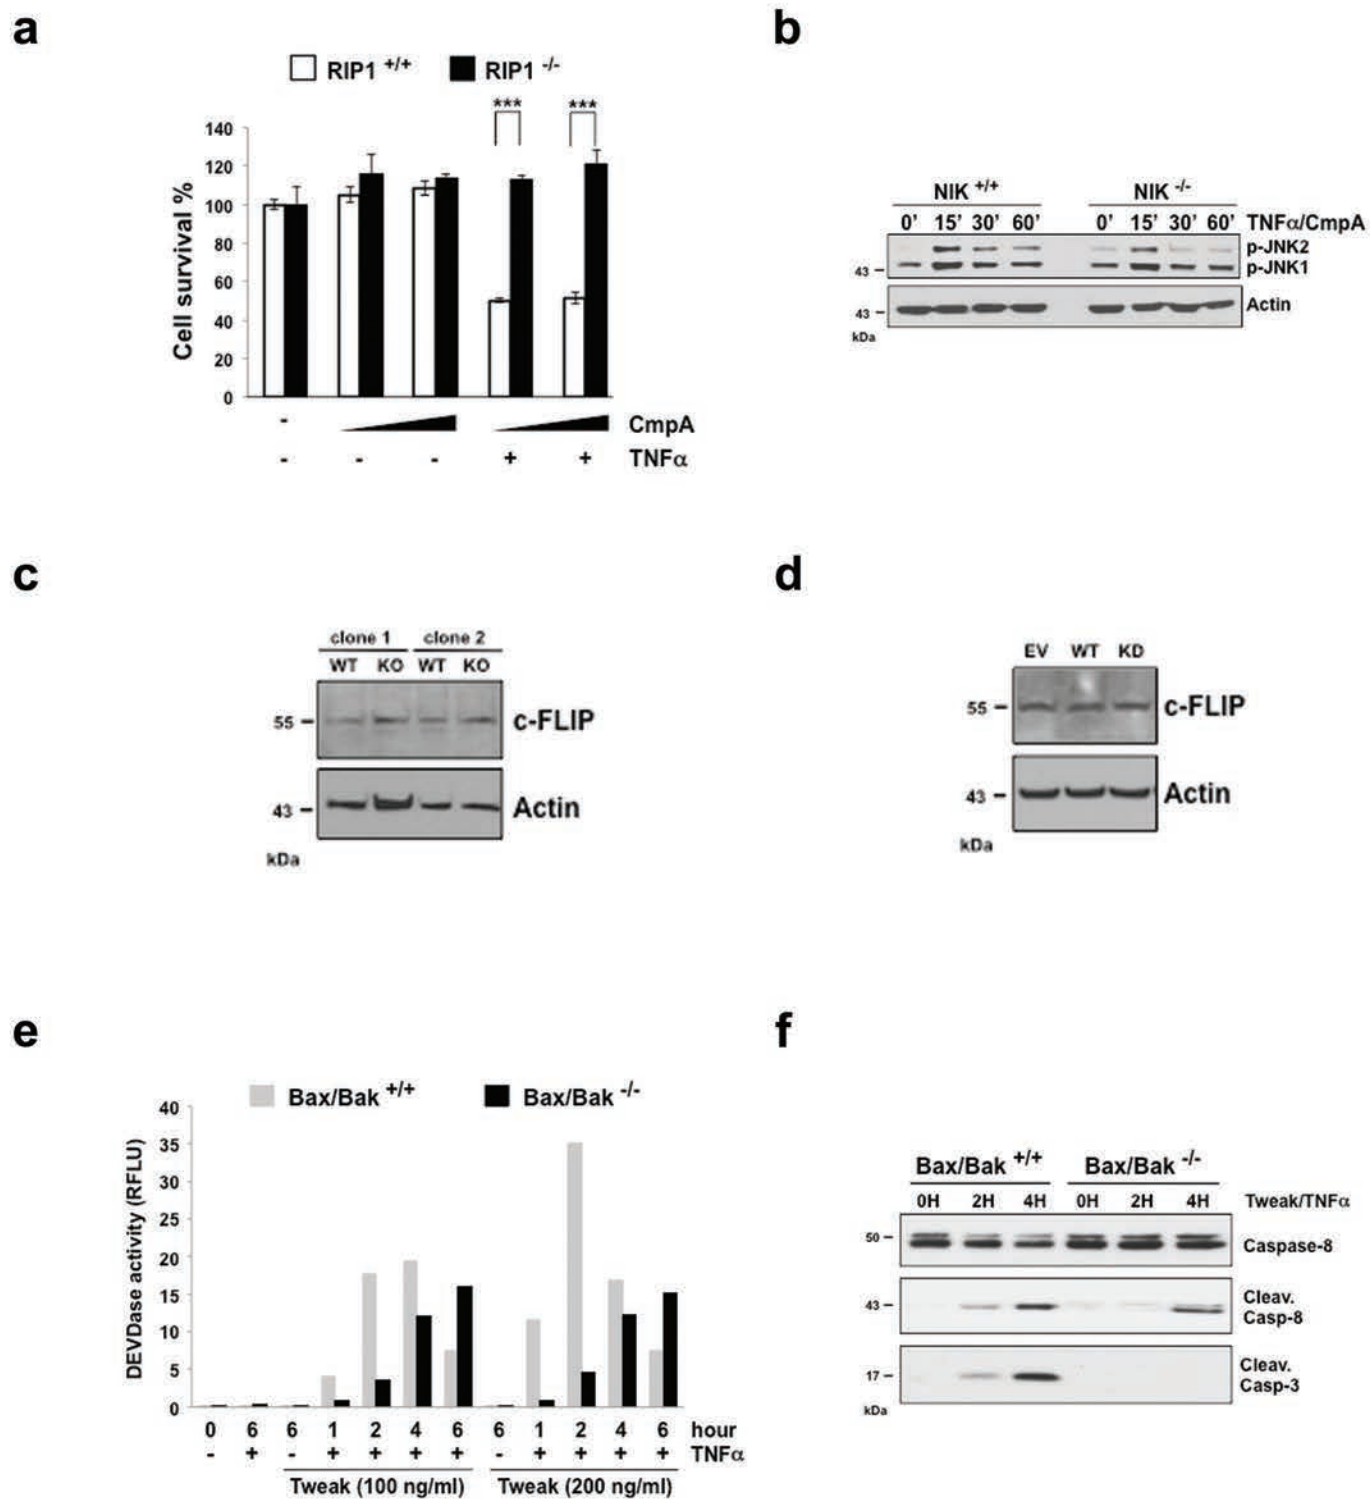

**a**

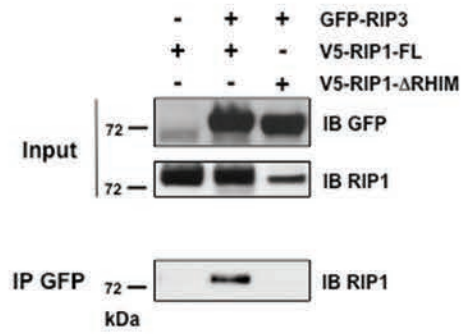

**b**

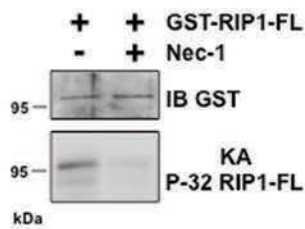

**c**

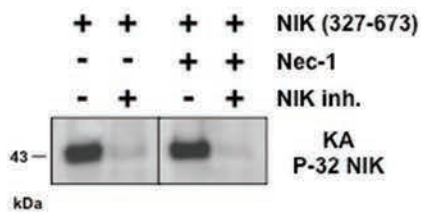

**d**

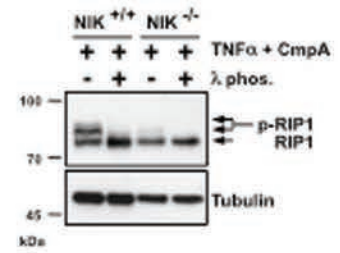

**e**

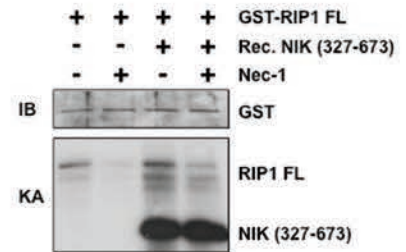

**f**

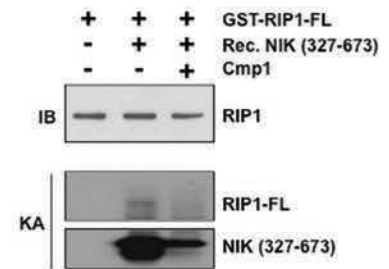

**a**

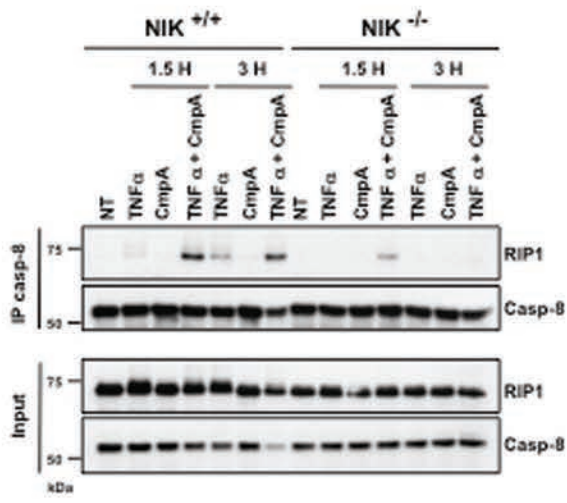

**b**

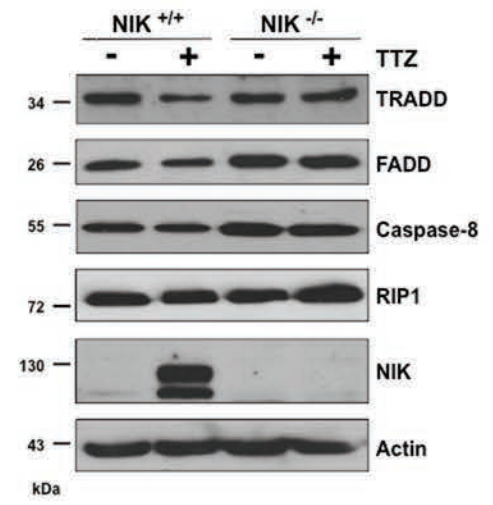

**c**

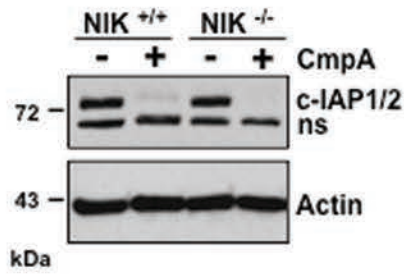

**d**

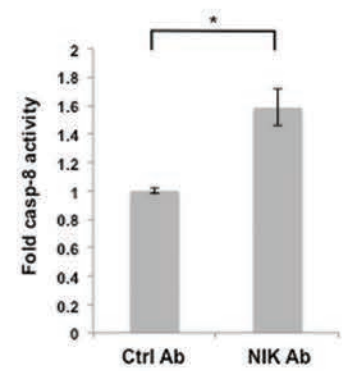

a

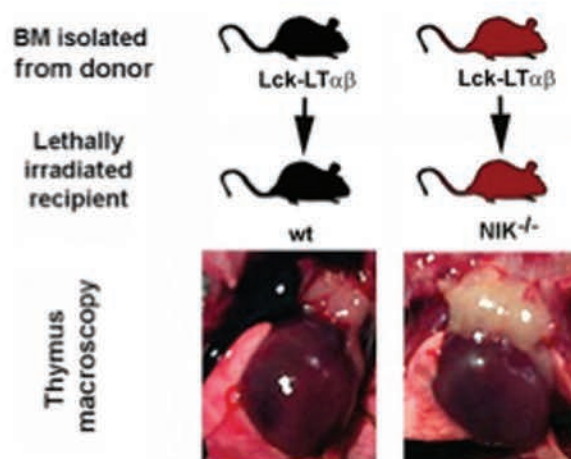

b

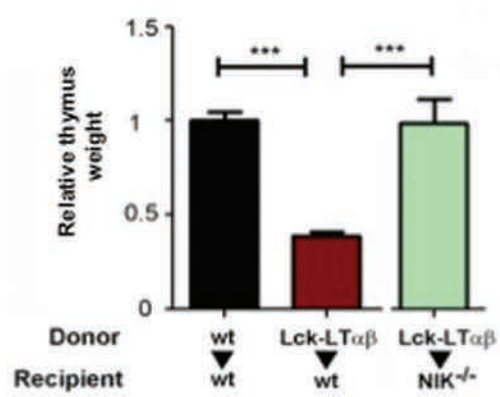

c

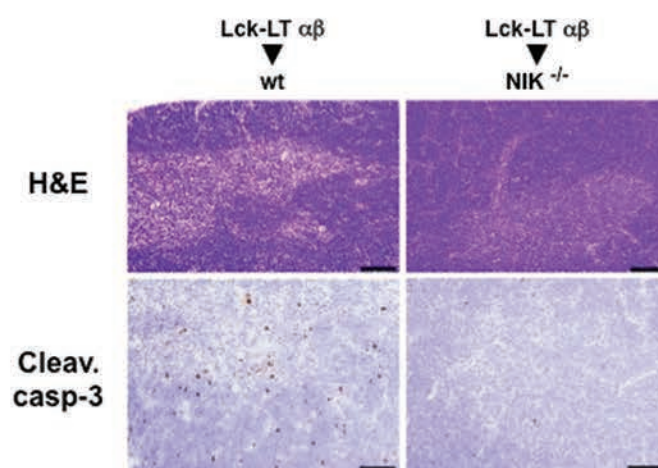

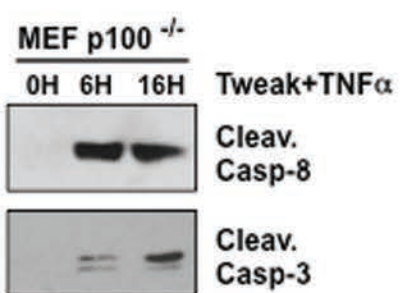

**a**

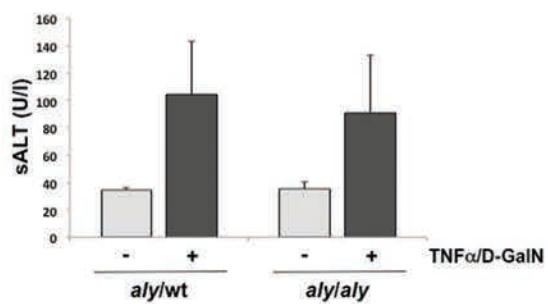

**c**

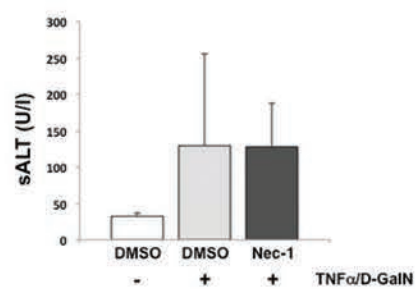

**b**

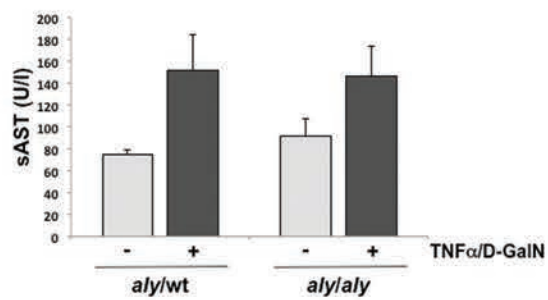

**d**

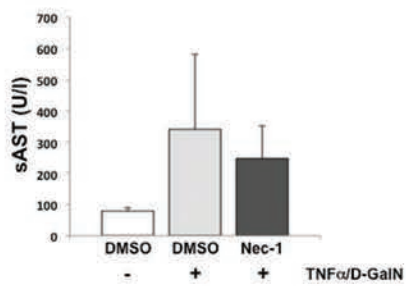

Figure S1: NIK-deficient cells resist to Tweak/TNF $\alpha$ -induced cell death

**(a)** Two independent clones of NIK WT and NIK KO MEFs were treated for 24 hours with Tweak (200 ng/ml) and TNF $\alpha$  (200 U/ml) and cell survival was measured with Cell Titer-Glo kit. **(b)** *aly/aly* homozygote MEFs were treated and analyzed like in **(a)**.

Figure S2: NIK/RIP1-mediated caspase activation acts through the mitochondrial pathway

**(a)** RIP1<sup>+/+</sup> and RIP1<sup>-/-</sup> MEFs were treated for 24 hours with or without TNF $\alpha$  (200 U/ml) and increasing amount of the Smac mimetics CmpA (250 nM), and cell survival was measured with Cell Titer-Glo kit. **(b)** NIK<sup>+/+</sup> and NIK<sup>-/-</sup> MEFs were treated as indicated and protein extracts were analyzed by Western-blot for phospho-JNK expression. **(c)** Independent WT and KO MEFs for NIK were tested for their expression level of c-FLIP by Western-blot. **(d)** NIK KO MEFs reconstituted with empty vector (EV), NIK WT (WT) or NIK kinase-dead (KD) were analyzed for their c-FLIP content **(e)** DEVDase activity of Bax/Bak<sup>+/+</sup> and Bax/Bak<sup>-/-</sup> MEFs treated for various time with two doses of Tweak and a fixed concentration of TNF $\alpha$  (200 U/ml). **(f)** Bax/Bak<sup>+/+</sup> and Bax/Bak<sup>-/-</sup> MEFs were treated with Tweak (200 ng/ml) and TNF $\alpha$  (200 U/ml) for different time periods. Levels of cleaved caspase-8 and cleaved caspase-3 were assessed by Western-blot. Statistical analyses: \*\*\* P<0.001.

Figure S3: RIP1 is a substrate of NIK but its interaction does not require the RHIM domain



**(a)** HEK293T cells were transfected with GFP-RIP3 and FL kinase dead RIP1-V5 or  $\Delta$ RHIM RIP1-V5 expression vectors. RIP3-GFP complexes were immunoprecipitated using an anti-GFP antibody and RIP1 interactions were revealed by Western-blot with an anti-RIP1 antibody. **(b)** Specificity of recombinant full-length RIP1 was assessed by *in vitro* kinase assay using RIP1 kinase inhibitor Nec-1. **(c)** Specificity of recombinant NIK kinase domain was assessed by *in vitro* kinase assay using NIK kinase inhibitor and/or RIP1 kinase inhibitor Nec-1. **(d)** NIK<sup>+/+</sup> and NIK<sup>-/-</sup> MEFs were left untreated or treated with a mix of TNF $\alpha$  and Smac mimetics (CmpA) and the phosphorylation status of RIP1 was analyzed by Western-blot with cell extracts treated or not with lambda phosphatase ( $\lambda$  phos.). **(e)** *In vitro* kinase assay with active full-length RIP1 in the presence of active recombinant NIK and the RIP1 kinase inhibitor Nec-1. **(f)** *In vitro* kinase assay with inactive full-length RIP1 in the presence of active recombinant NIK.

Figure S4: Smac mimetics/TNF $\alpha$ -induced complex IIb assembly is defective in NIK-deficient MEFs

**(a)** NIK<sup>+/+</sup> and NIK<sup>-/-</sup> MEFs were treated with CmpA and/or TNF $\alpha$  for the indicated time periods prior to an immunoprecipitation with an anti-caspase-8 antibody and detection of both caspase-8 and RIP1 by Western-blot. **(b)** Expression profile of death domain-containing proteins in NIK<sup>+/+</sup> and NIK<sup>-/-</sup> MEFs treated with Tweak/TNF $\alpha$  in the presence of z-VAD-FMK (TTZ). **(c)** Level of c-IAP1/2 depletion in NIK<sup>+/+</sup> and NIK<sup>-/-</sup> MEFs treated with CmpA, ns, non-specific signal. **(d)** NIK<sup>+/+</sup> MEFs were treated with Tweak/TNF $\alpha$ /Z-VAD for 60 min. prior to immunoprecipitation with irrelevant or anti-NIK antibodies. The immunoprecipitates were subjected to *in vitro* caspase-8 activity measurement. P value was 0,02.

Figure S5: TNFR1/LTβR-induced thymus involution and cell death is blocked in NIK knock-out mice.

**(a)** Images of thymi from postnatal (8 weeks) BM reconstitution experiments. Lethally irradiated (1100 rad) WT and NIK<sup>-/-</sup> recipient mice were reconstituted with BM from Tg Lck-LTαβ mice. **(b)** Quantitative analyses of relative thymus weight of reconstitution experiments achieved in (a). **(c)** Analysis of thymic architecture (H&E staining) of the indicated post-reconstitution (5-6 weeks) experiments and cleaved caspase-3 staining. Statistical analyses: \*\*\* P<0.001.

Figure S6: p100-deficiency does not prevent Tweak/TNFα-induced apoptosis.

MEFs deficient for p100 treated with Tweak and TNFα displays the apoptotic cleavage of caspase-8 and caspase-3.

Figure S7: RIP1 and NIK mediate Adenoviral/TNFα-induced hepatocyte caspase-3 cleavage.

**(a, b)** Dosage of serum ALT and serum AST in *aly*/wt (n=3) and *aly / aly* (n=3) mice treated for 4 hours with D-Gal-N and TNFα. **(c, d)** Dosage of serum ALT and serum AST in WT mice treated for 4 hours with D-Gal-N and TNFα in the presence or absence of Nec-1 (n=3 for each treatment).
